# Supplementary material for: High-throughput prediction of oxygen vacancy defect migration near misfit dislocations in SrTiO3/BaZrO3 heterostructures
Source: Royal Society of Chemistry journal article supplement (doi:10.1039/d3ma00850a), 2023-11-23

**High-throughput prediction of oxygen vacancy defect migration near  
misfit dislocations in SrTiO<sub>3</sub>/BaZrO<sub>3</sub> heterostructures**

William Ebmeyer and Pratik P. Dholabhai\*

*School of Physics and Astronomy  
Rochester Institute of Technology  
Rochester, NY 14623*

\* Email: [pratik.dholabhai@rit.edu](mailto:pratik.dholabhai@rit.edu)

## Supporting Information

**Figure 1.** Visualization of a single atomic layer for SrO–ZrO<sub>2</sub> and TiO<sub>2</sub>–BaO interfaces. (a) SrO side of SrO–ZrO<sub>2</sub> (b) ZrO<sub>2</sub> side of SrO–ZrO<sub>2</sub> (c) TiO<sub>2</sub> side of TiO<sub>2</sub>–BaO (d) BaO side of TiO<sub>2</sub>–BaO. Interface orientation is same for all materials as given in (c). Atomic color scheme is given below the figure panel.

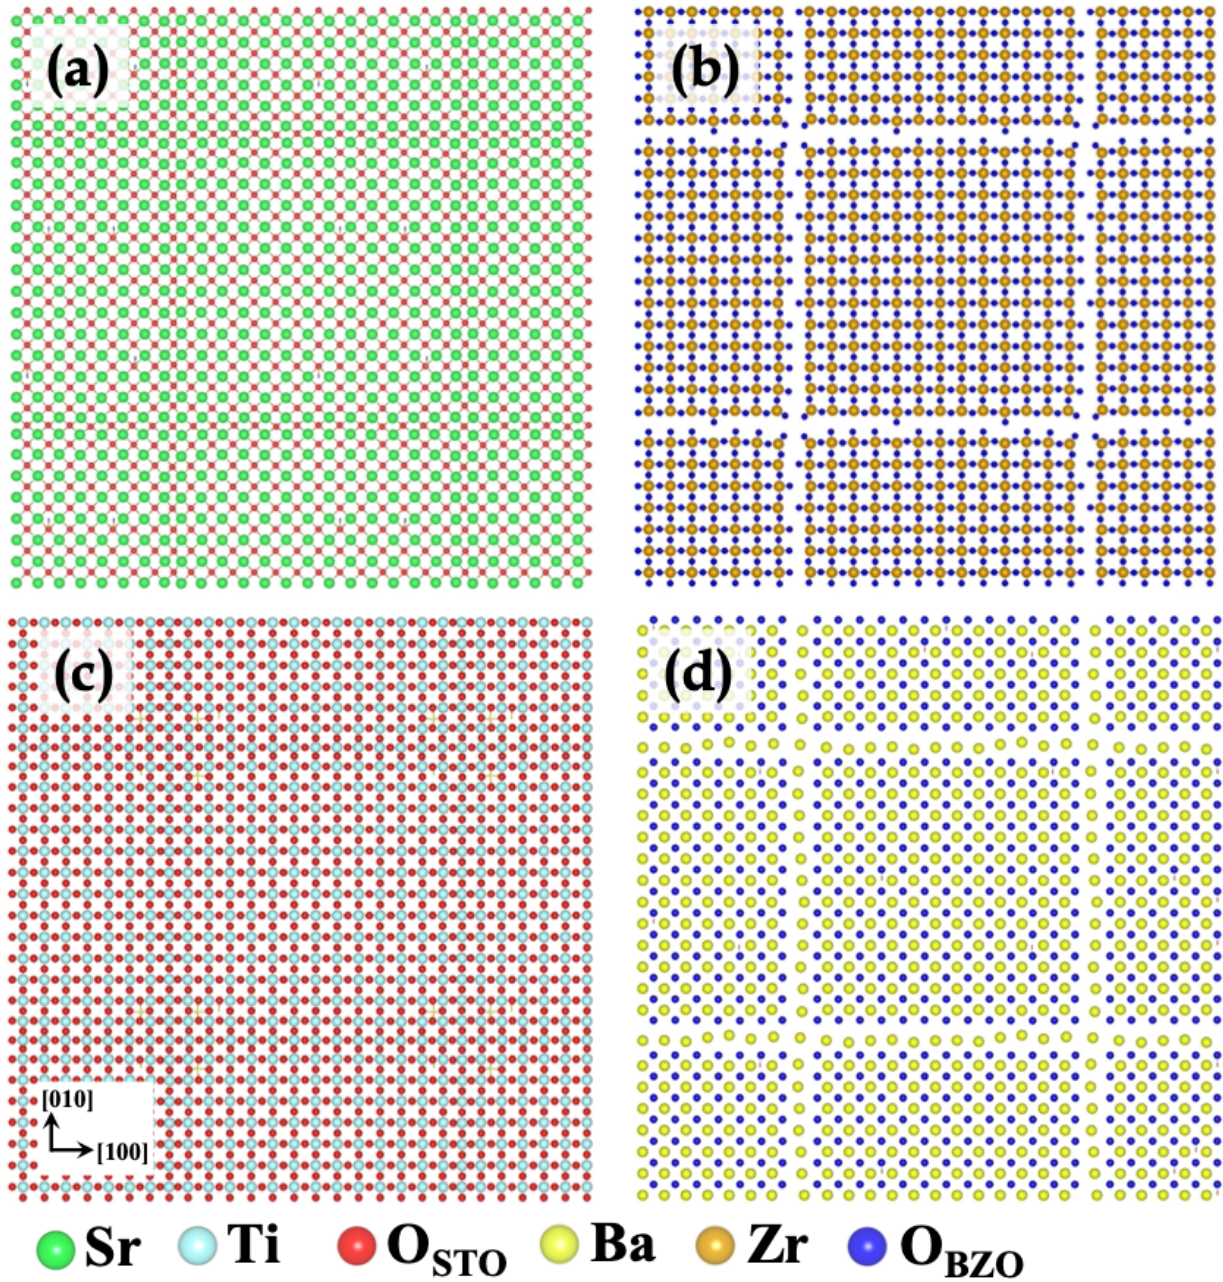

**Figure 2.** Visualization of a single atomic layer for SrO–BaO and TiO<sub>2</sub>–ZrO<sub>2</sub> interfaces. (a) SrO side of SrO–BaO (b) BaO side of SrO–BaO (c) TiO<sub>2</sub> side of TiO<sub>2</sub>–ZrO<sub>2</sub> (d) ZrO<sub>2</sub> side of TiO<sub>2</sub>–ZrO<sub>2</sub>. Interface orientation is same for all materials as given in (c). Atomic color scheme is given below the figure panel.

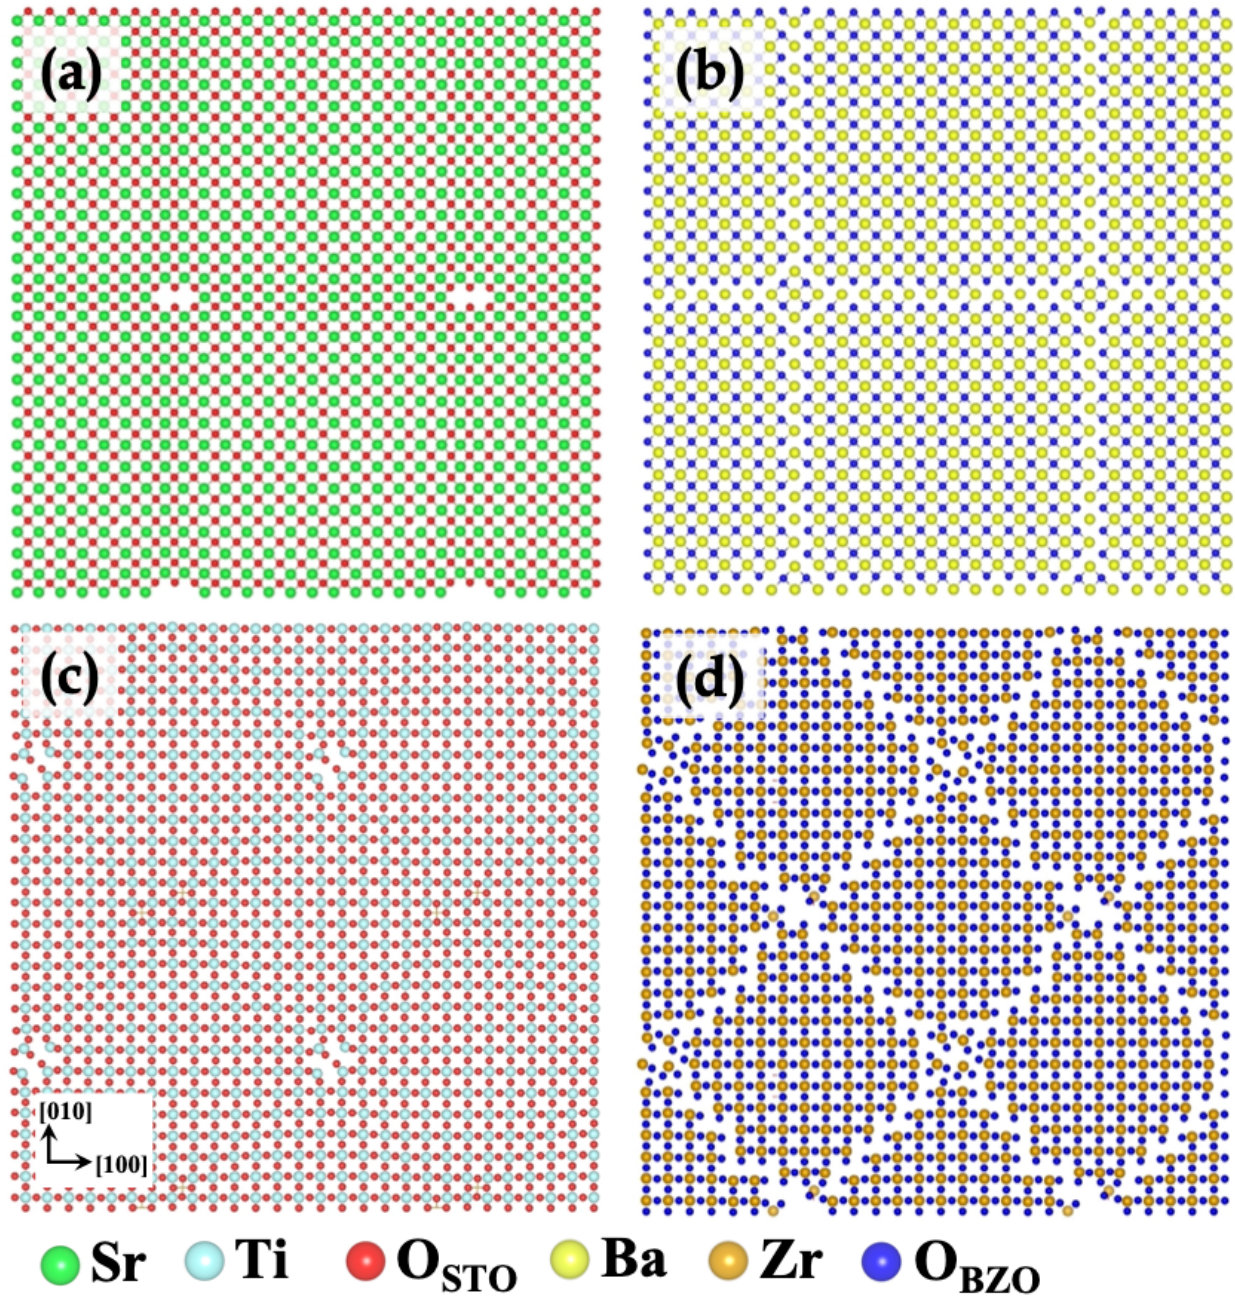

Supplement: d3ma00850a1.pdf [file d3ma00850a1.pdf]
